# Supplementary material for: Heart Rate Variability and Cognition: A Narrative Systematic Review of Longitudinal Studies
Source: MDPI journal article supplement (doi:10.3390/jcm13010280), 2024-01-04
Supplement: s1 [file s1]

## Supplementary Materials

**Supplementary Table S1.** Further aspects of HRV methodology of the included studies.

| Study                              | Stabilization period                                                     | Artifact detection                                     | Artifact correction                                                                                                     | Respiratory rate                       |
|------------------------------------|--------------------------------------------------------------------------|--------------------------------------------------------|-------------------------------------------------------------------------------------------------------------------------|----------------------------------------|
| Britton et al., 2008 [66]          | 5 min <sup>a</sup>                                                       | Fully automated algorithm <sup>a</sup>                 | Artifact-free data <sup>a</sup>                                                                                         | Not assessed                           |
| Mahinrad et al., 2016 [67]         | NA                                                                       | Fully automated algorithm                              | NA                                                                                                                      | Not assessed                           |
| Zeki Al Hazzouri et al., 2017 [64] | NA                                                                       | Automated algorithm and visual inspection              | NA                                                                                                                      | Not assessed                           |
| Kim et al., 2018 [68]              | NR                                                                       | NR                                                     | Artifact-free data                                                                                                      | Assessed but not reported              |
| Knight et al., 2020 [69]           | NA                                                                       | Automated algorithm and visual inspection <sup>a</sup> | Inclusion threshold: ectopics < 20 % of total beats <sup>a</sup><br>(method of correction: interpolation <sup>a</sup> ) | Assessed <sup>a</sup> but not reported |
| Schaich et al., 2020 [70]          | At least 5 min <sup>a</sup>                                              | Automated algorithm and visual inspection              | Inclusion threshold: ectopics ≤ 50 % of total beats <sup>a</sup><br>(method of correction NA)                           | Not assessed                           |
| Costa et al., 2021 [7]             | NA                                                                       | Automated algorithm and visual inspection              | Inclusion threshold: ectopics < 25 % of total beats<br>(method of correction NA)                                        | Assessed but not reported              |
| Weinstein et al., 2021 [71]        | NAP                                                                      | Automated algorithm and visual inspection <sup>a</sup> | Inclusion threshold: ectopics < 10 % of total beats <sup>a</sup><br>(method of correction NA)                           | Not assessed                           |
| Chou et al., 2022 [72]             | At least 15 min                                                          | NA                                                     | NA                                                                                                                      | Not assessed                           |
| Gafni et al., 2022 [73]            | NA                                                                       | Automated algorithm and visual inspection <sup>a</sup> | NA                                                                                                                      | Not assessed                           |
| Nicolini et al., 2022 [74]         | 5 min (for active standing) and 10 min (for resting and paced breathing) | Automated algorithm and visual inspection              | Inclusion threshold: ectopics ≤ 1 % of total beats<br>(method of correction: interpolation)                             | Assessed and reported                  |
| Sabil et al., 2022 [75]            | NA                                                                       | Fully automated algorithm <sup>a</sup>                 | Artifact-free data <sup>a</sup>                                                                                         | Assessed but not reported              |

### Legend

<sup>a</sup> Information retrieved from additional references (see Supplementary Table S2). Abbreviations: NA, not available; NAP, not applicable; NR, not reported.

**Supplementary Table S2.** Additional references used to retrieve greater details of HRV methodology of the included studies.

| Study                              | Additional references                                          |
|------------------------------------|----------------------------------------------------------------|
| Britton et al., 2008 [66]          | Hansen et al., 2019 [56]                                       |
| Mahinrad et al., 2016 [67]         | - <sup>a</sup>                                                 |
| Zeki Al Hazzouri et al., 2017 [64] | Friedman et al., 1988 [57]                                     |
| Kim et al., 2018 [68]              | - <sup>a</sup>                                                 |
| Knight et al., 2020 [69]           | Ryff et al., 2022 [58], Nevels et al., 2023 [59]               |
| Schaich et al., 2020 [70]          | O'Neal et al., 2016 [60], Habibi et al., 2019 [61]             |
| Costa et al., 2021 [7]             | - <sup>a</sup>                                                 |
| Weinstein et al., 2021 [71]        | Tsuji et al., 1996 [62]                                        |
| Chou et al., 2022 [72]             | Wu et al., 2008 [63]                                           |
| Gafni et al., 2022 [73]            | Friedman et al., 1988 [57], Zeki Al Hazzouri et al., 2017 [64] |
| Nicolini et al., 2022 [74]         | - <sup>a</sup>                                                 |
| Sabil et al., 2022 [75]            | Blanchard et al., 2021 [65]                                    |

#### Legend

<sup>a</sup> Greater details not retrievable.

**Supplementary Table S3.** Quality assessment of the included studies based on the Newcastle-Ottawa Scale for Cohort Studies.

| Study                              | Selection                                   |                                        |                              |                                                                             | Comparability                                                  | Outcome                  |                                                    |                                     | Total score (stars) | Quality† (AHRQ standards) |
|------------------------------------|---------------------------------------------|----------------------------------------|------------------------------|-----------------------------------------------------------------------------|----------------------------------------------------------------|--------------------------|----------------------------------------------------|-------------------------------------|---------------------|---------------------------|
|                                    | 1) Representativeness of the exposed cohort | 2) Selection of the non-exposed cohort | 3) Ascertainment of exposure | 4) Demonstration that outcome of interest was not present at start of study | 1) Comparability of cohorts on the basis of design or analysis | 1) Assessment of outcome | 2) Was follow-up long enough for outcomes to occur | 3) Adequacy of follow-up of cohorts |                     |                           |
| Britton et al., 2008 [66]          | * (b)                                       | * (a)                                  | * (a)                        | * (a)                                                                       | * (a)                                                          | * (a)                    | * (a)                                              | * (b)                               | 8                   | Good                      |
| Mahinrad et al., 2016 [67]         | (c)                                         | * (a)                                  | * (a)                        | * (a)                                                                       | * (a) * (b)                                                    | * (a)                    | * (a)                                              | * (b)                               | 8                   | Good                      |
| Zeki Al Hazzouri et al., 2017 [64] | * (a)                                       | * (a)                                  | * (a)                        | (b)                                                                         | * (a) * (b)                                                    | * (a)                    | * (a)                                              | * (b)                               | 8                   | Good                      |
| Kim et al., 2018 [68]              | (c)                                         | * (a)                                  | * (a)                        | * (a)                                                                       | * (a)                                                          | * (a)                    | * (a)                                              | (d)                                 | 6                   | Good                      |
| Knight et al., 2020 [69]           | * (a)                                       | * (a)                                  | * (a)                        | * (a)                                                                       | * (a) * (b)                                                    | * (a)                    | * (a)                                              | (c)                                 | 8                   | Good                      |
| Schaich et al., 2020 [70]          | * (b)                                       | * (a)                                  | * (a)                        | (b)                                                                         | * (a) * (b)                                                    | * (a)                    | * (a)                                              | (c)                                 | 7                   | Good                      |
| Costa et al., 2021 [7]             | * (a)                                       | * (a)                                  | * (a)                        | * (a)                                                                       | * (a) * (b)                                                    | * (a)                    | * (a)                                              | (c)                                 | 8                   | Good                      |
| Weinstein et al., 2021 [71]        | * (a)                                       | * (a)                                  | * (a)                        | * (a)                                                                       | * (a) * (b)                                                    | * (a)                    | * (a)                                              | * (b)                               | 9                   | Good                      |
| Chou et al., 2022 [72]             | * (a)                                       | * (a)                                  | * (a)                        | * (a)                                                                       | * (a) * (b)                                                    | * (b)                    | * (a)                                              | * (a)                               | 9                   | Good                      |
| Gafni et al., 2022 [73]            | * (a)                                       | * (a)                                  | * (a)                        | (b)                                                                         | * (a) * (b)                                                    | * (a)                    | * (a)                                              | * (b)                               | 8                   | Good                      |
| Nicolini et al., 2022 [74]         | (c)                                         | * (a)                                  | * (a)                        | * (a)                                                                       | * (a) * (b)                                                    | * (a)                    | * (a)                                              | * (b)                               | 8                   | Good                      |
| Sabil et al., 2022 [75]            | (c)                                         | * (a)                                  | * (a)                        | * (a)                                                                       | * (a) * (b)                                                    | * (b)                    | * (a)                                              | * (a)                               | 8                   | Good                      |

### Selection

1) Representativeness of the exposed cohort: a) truly representative of the average adult population in the community \*; b) somewhat representative of the average adult population in the community \*; c) selected group of users e.g. nurses, volunteers; d) no description of the derivation of the cohort.

2) Selection of the non-exposed cohort: a) drawn from the same community as the exposed cohort \*; b) drawn from a different source; c) no description of the derivation of the non-exposed cohort.

3) Ascertainment of exposure: a) secure record (e.g. surgical records) \*; b) structured interview \*; c) written self-report ; d) no description.

4) Demonstration that outcome of interest was not present at start of study: a) yes \*; b) no.

### **Comparability**

1) Comparability of cohorts on the basis of the design or analysis: a) study controls for demographics \*; b) study controls for additional factors \*.

### **Outcome**

1) Assessment of outcome: a) independent blind assessment \*; b) record linkage \*; c) self-report; d) no description.

2) Was follow-up long enough for outcomes to occur: a) yes ( $\geq 2$  years) \*‡; b) no.

3) Adequacy of follow-up of cohorts: a) complete follow-up - all subjects accounted for \*; b) subjects lost to follow-up unlikely to introduce bias - number lost  $\leq 20\%$ <sup>¶</sup> or description provided of those lost suggested no different from those followed \*; c) follow-up rate  $< 80\%$ <sup>¶</sup> and no description of those lost; d) no statement.

Note: A study can be awarded a maximum of one star for each numbered item within the Selection and Outcome categories. A maximum of two stars can be given for Comparability.

---

### **Legend**

† Thresholds for converting the Newcastle-Ottawa Scale to AHRQ standards (good, fair, and poor): Good quality: 3 or 4 stars in selection domain AND 1 or 2 stars in comparability domain AND 2 or 3 stars in outcome/exposure domain; Fair quality: 2 stars in selection domain AND 1 or 2 stars in comparability domain AND 2 or 3 stars in outcome/exposure domain; Poor quality: 0 or 1 star in selection domain OR 0 stars in comparability domain OR 0 or 1 stars in outcome/exposure domain.

‡ Adequate duration of follow-up set at  $\geq 2$  years based on the shortest follow-up of studies investigating the longitudinal trajectories of cognitive function in a general adult population [49] and on the mean follow-up of studies on conversion of MCI to dementia [91].

<sup>¶</sup> Acceptable loss to follow-up defined as  $\leq 20\%$  according to a general consensus [92].

Abbreviations: AHRQ, Agency for Health Research and Quality; MCI, Mild Cognitive Impairment.

**Supplementary Table S4.** Relationship between HRV indices and cognitive outcomes in the included studies.

|              |                    | Cognitive outcome         |          |                                                                            |                                                                                                                                               |                            |                                                                                                                   |                          |                            |                                                                                                                                                |                                                    |          |    |                         |                                                                            |                                                |
|--------------|--------------------|---------------------------|----------|----------------------------------------------------------------------------|-----------------------------------------------------------------------------------------------------------------------------------------------|----------------------------|-------------------------------------------------------------------------------------------------------------------|--------------------------|----------------------------|------------------------------------------------------------------------------------------------------------------------------------------------|----------------------------------------------------|----------|----|-------------------------|----------------------------------------------------------------------------|------------------------------------------------|
|              |                    | Global cognition          |          |                                                                            | Executive functioning domain                                                                                                                  |                            |                                                                                                                   | Episodic memory domain   |                            |                                                                                                                                                | Language domain                                    |          |    | Dementia                |                                                                            |                                                |
| Relationship |                    | Positive                  | Negative | No                                                                         | Positive                                                                                                                                      | Negative                   | No                                                                                                                | Positive                 | Negative                   | No                                                                                                                                             | Positive                                           | Negative | No | Positive                | Negative                                                                   | No                                             |
| HRV index    | SDNN               | Schaich et al., 2020 [70] | X        | Costa et al., 2021 [7], Gafni et al., 2022 [73]                            | Britton et al., 2008 [66], Mahinrad et al., 2016 [67], Zeki al Hazzouri et al., 2017 [64], Schaich et al., 2020 [70], Gafni et al., 2022 [73] | X                          | Costa et al., 2021 [7], Nicolini et al., 2022 [74]                                                                | X                        | X                          | Britton et al., 2008 [66], Mahinrad et al., 2016 [67], Zeki al Hazzouri et al., 2017 [64], Gafni et al., 2022 [73], Nicolini et al., 2022 [74] | Britton et al., 2008 [66], Gafni et al., 2022 [73] | X        | X  | Sabil et al., 2022 [75] | Kim et al., 2018 [68], Weinstein et al., 2021 [71], Chou et al., 2022 [72] | X                                              |
|              | RMSSD              | X                         | X        | Schaich et al., 2020 [70], Costa et al., 2021 [7], Gafni et al., 2022 [73] | Gafni et al., 2022 [73]                                                                                                                       | X                          | Zeki al Hazzouri et al., 2017 [64], Schaich et al., 2020 [70], Costa et al., 2021 [7], Nicolini et al., 2022 [74] | X                        | X                          | Hazzouri et al., 2017 [64], Gafni et al., 2022 [73], Nicolini et al., 2022 [74]                                                                | Gafni et al., 2022 [73]                            | X        | X  | Sabil et al., 2022 [75] | Kim et al., 2018 [68], Weinstein et al., 2021 [71]                         | X                                              |
|              | pNN50              | X                         | X        | X                                                                          | X                                                                                                                                             | X                          | Nicolini et al., 2022 [74]                                                                                        | X                        | X                          | Nicolini et al., 2022 [74]                                                                                                                     | X                                                  | X        | X  | X                       | X                                                                          | X                                              |
|              | TP                 | X                         | X        | X                                                                          | X                                                                                                                                             | X                          | Nicolini et al., 2022 [74]                                                                                        | X                        | X                          | Nicolini et al., 2022 [74]                                                                                                                     | X                                                  | X        | X  | X                       | Kim et al., 2018 [68]                                                      | X                                              |
|              | LF                 | X                         | X        | X                                                                          | Britton et al., 2008 [66]                                                                                                                     | X                          | Nicolini et al., 2022 [74]                                                                                        | X                        | X                          | Britton et al., 2008 [66], Nicolini et al., 2022 [74]                                                                                          | Britton et al., 2008 [66]                          | X        | X  | X                       | Kim et al., 2018 [68]                                                      | Chou et al., 2022 [72]                         |
|              | HF                 | Knight et al., 2020 [69]  | X        | Costa et al., 2021 [7]                                                     | Britton et al., 2008 [66], Knight et al., 2020 [69]                                                                                           | X                          | Costa et al., 2021 [7], Nicolini et al., 2022 [74]                                                                | Knight et al., 2020 [69] | X                          | Britton et al., 2008 [66], Nicolini et al., 2022 [74]                                                                                          | Britton et al., 2008 [66]                          | X        | X  | X                       | Kim et al., 2018 [68]                                                      | Chou et al., 2022 [72]                         |
|              | LFn <sup>a</sup>   | X                         | X        | X                                                                          | X                                                                                                                                             | Nicolini et al., 2022 [74] | X                                                                                                                 | X                        | Nicolini et al., 2022 [74] | X                                                                                                                                              | X                                                  | X        | X  | X                       | X                                                                          | Sabil et al., 2022 [75]                        |
|              | HF <sub>n</sub>    | X                         | X        | X                                                                          | X                                                                                                                                             | X                          | X                                                                                                                 | X                        | X                          | X                                                                                                                                              | X                                                  | X        | X  | X                       | X                                                                          | Sabil et al., 2022 [75]                        |
|              | LF/HF <sup>a</sup> | X                         | X        | X                                                                          | X                                                                                                                                             | Nicolini et al., 2022 [74] | X                                                                                                                 | X                        | Nicolini et al., 2022 [74] | X                                                                                                                                              | X                                                  | X        | X  | Chou et al., 2022 [72]  | X                                                                          | Kim et al., 2018 [68], Sabil et al., 2022 [75] |

(continued on next page)
